# Supplementary material for: Aeolus wind lidar observations of the 2019/2020 quasi-biennial oscillation disruption with comparison to radiosondes and reanalysis
Source: Copernicus journal article supplement (doi:10.5194/acp-24-2465-2024), 2024-02-27
Supplement: Supplementary file 2 [file acp-24-2465-2024-supplement.zip]

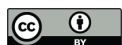

*Supplement of*

**Aeolus wind lidar observations of the 2019/2020 quasi-biennial oscillation disruption with comparison to radiosondes and reanalysis**

**Timothy P. Banyard et al.**

*Correspondence to:* Timothy P. Banyard (tpb38@bath.ac.uk, timothy.banyard@manchester.ac.uk)

- acp-24-2465-2024-supplement-title-page.pdf
- Banyard\_et\_al\_QBO\_Aeolus\_ACP\_Supplementary\_RESUB3.pdf
- animfigs2b.gif
- figs1.png
- figs3.png

The copyright of individual parts of the supplement might differ from the article licence.
