# Supplementary material for: Aeolus wind lidar observations of the 2019/2020 quasi-biennial oscillation disruption with comparison to radiosondes and reanalysis
Source: Copernicus journal article supplement (doi:10.5194/acp-24-2465-2024), 2024-02-27
Supplement: Supplementary file 3 [file acp-24-2465-2024-supplement.zip]

Archive with 5 entries (5 files):
- Banyard_et_al_QBO_Aeolus_ACP_Supplementary_RESUB3.pdf
- animfigs2b.gif
- figs1.png
- acp-24-2465-2024-supplement-title-page.pdf
- figs3.png
