# Supplementary figures and images for: Aeolus wind lidar observations of the 2019/2020 quasi-biennial oscillation disruption with comparison to radiosondes and reanalysis
Source: Copernicus journal article supplement (doi:10.5194/acp-24-2465-2024), 2024-02-27

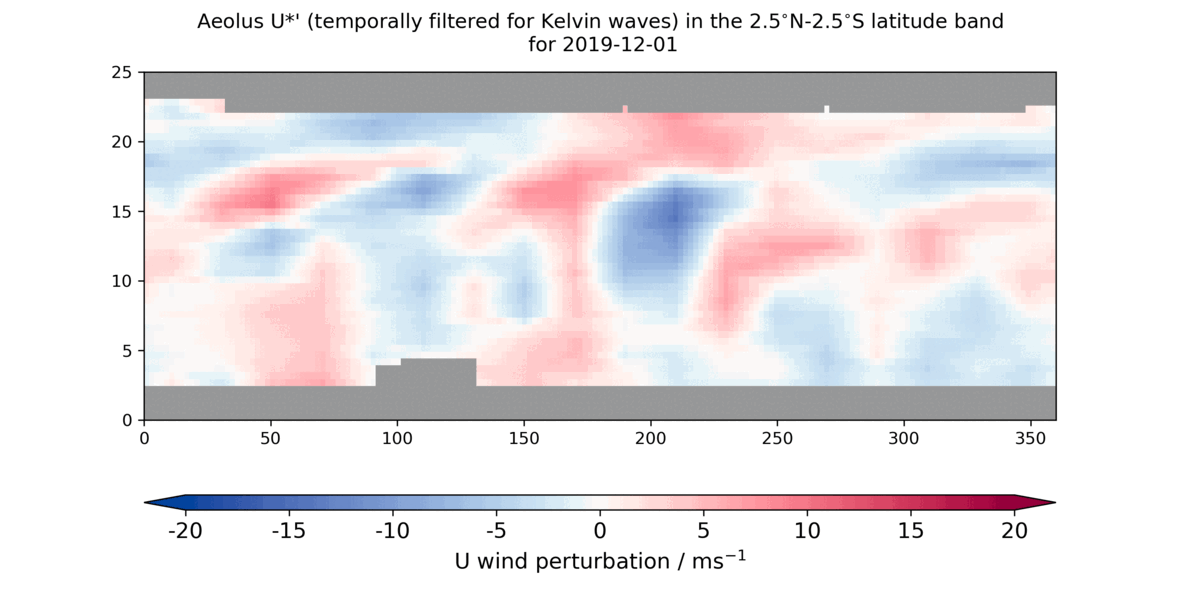

Supplement: Supplementary file 3 [file acp-24-2465-2024-supplement.zip › animfigs2b.gif]

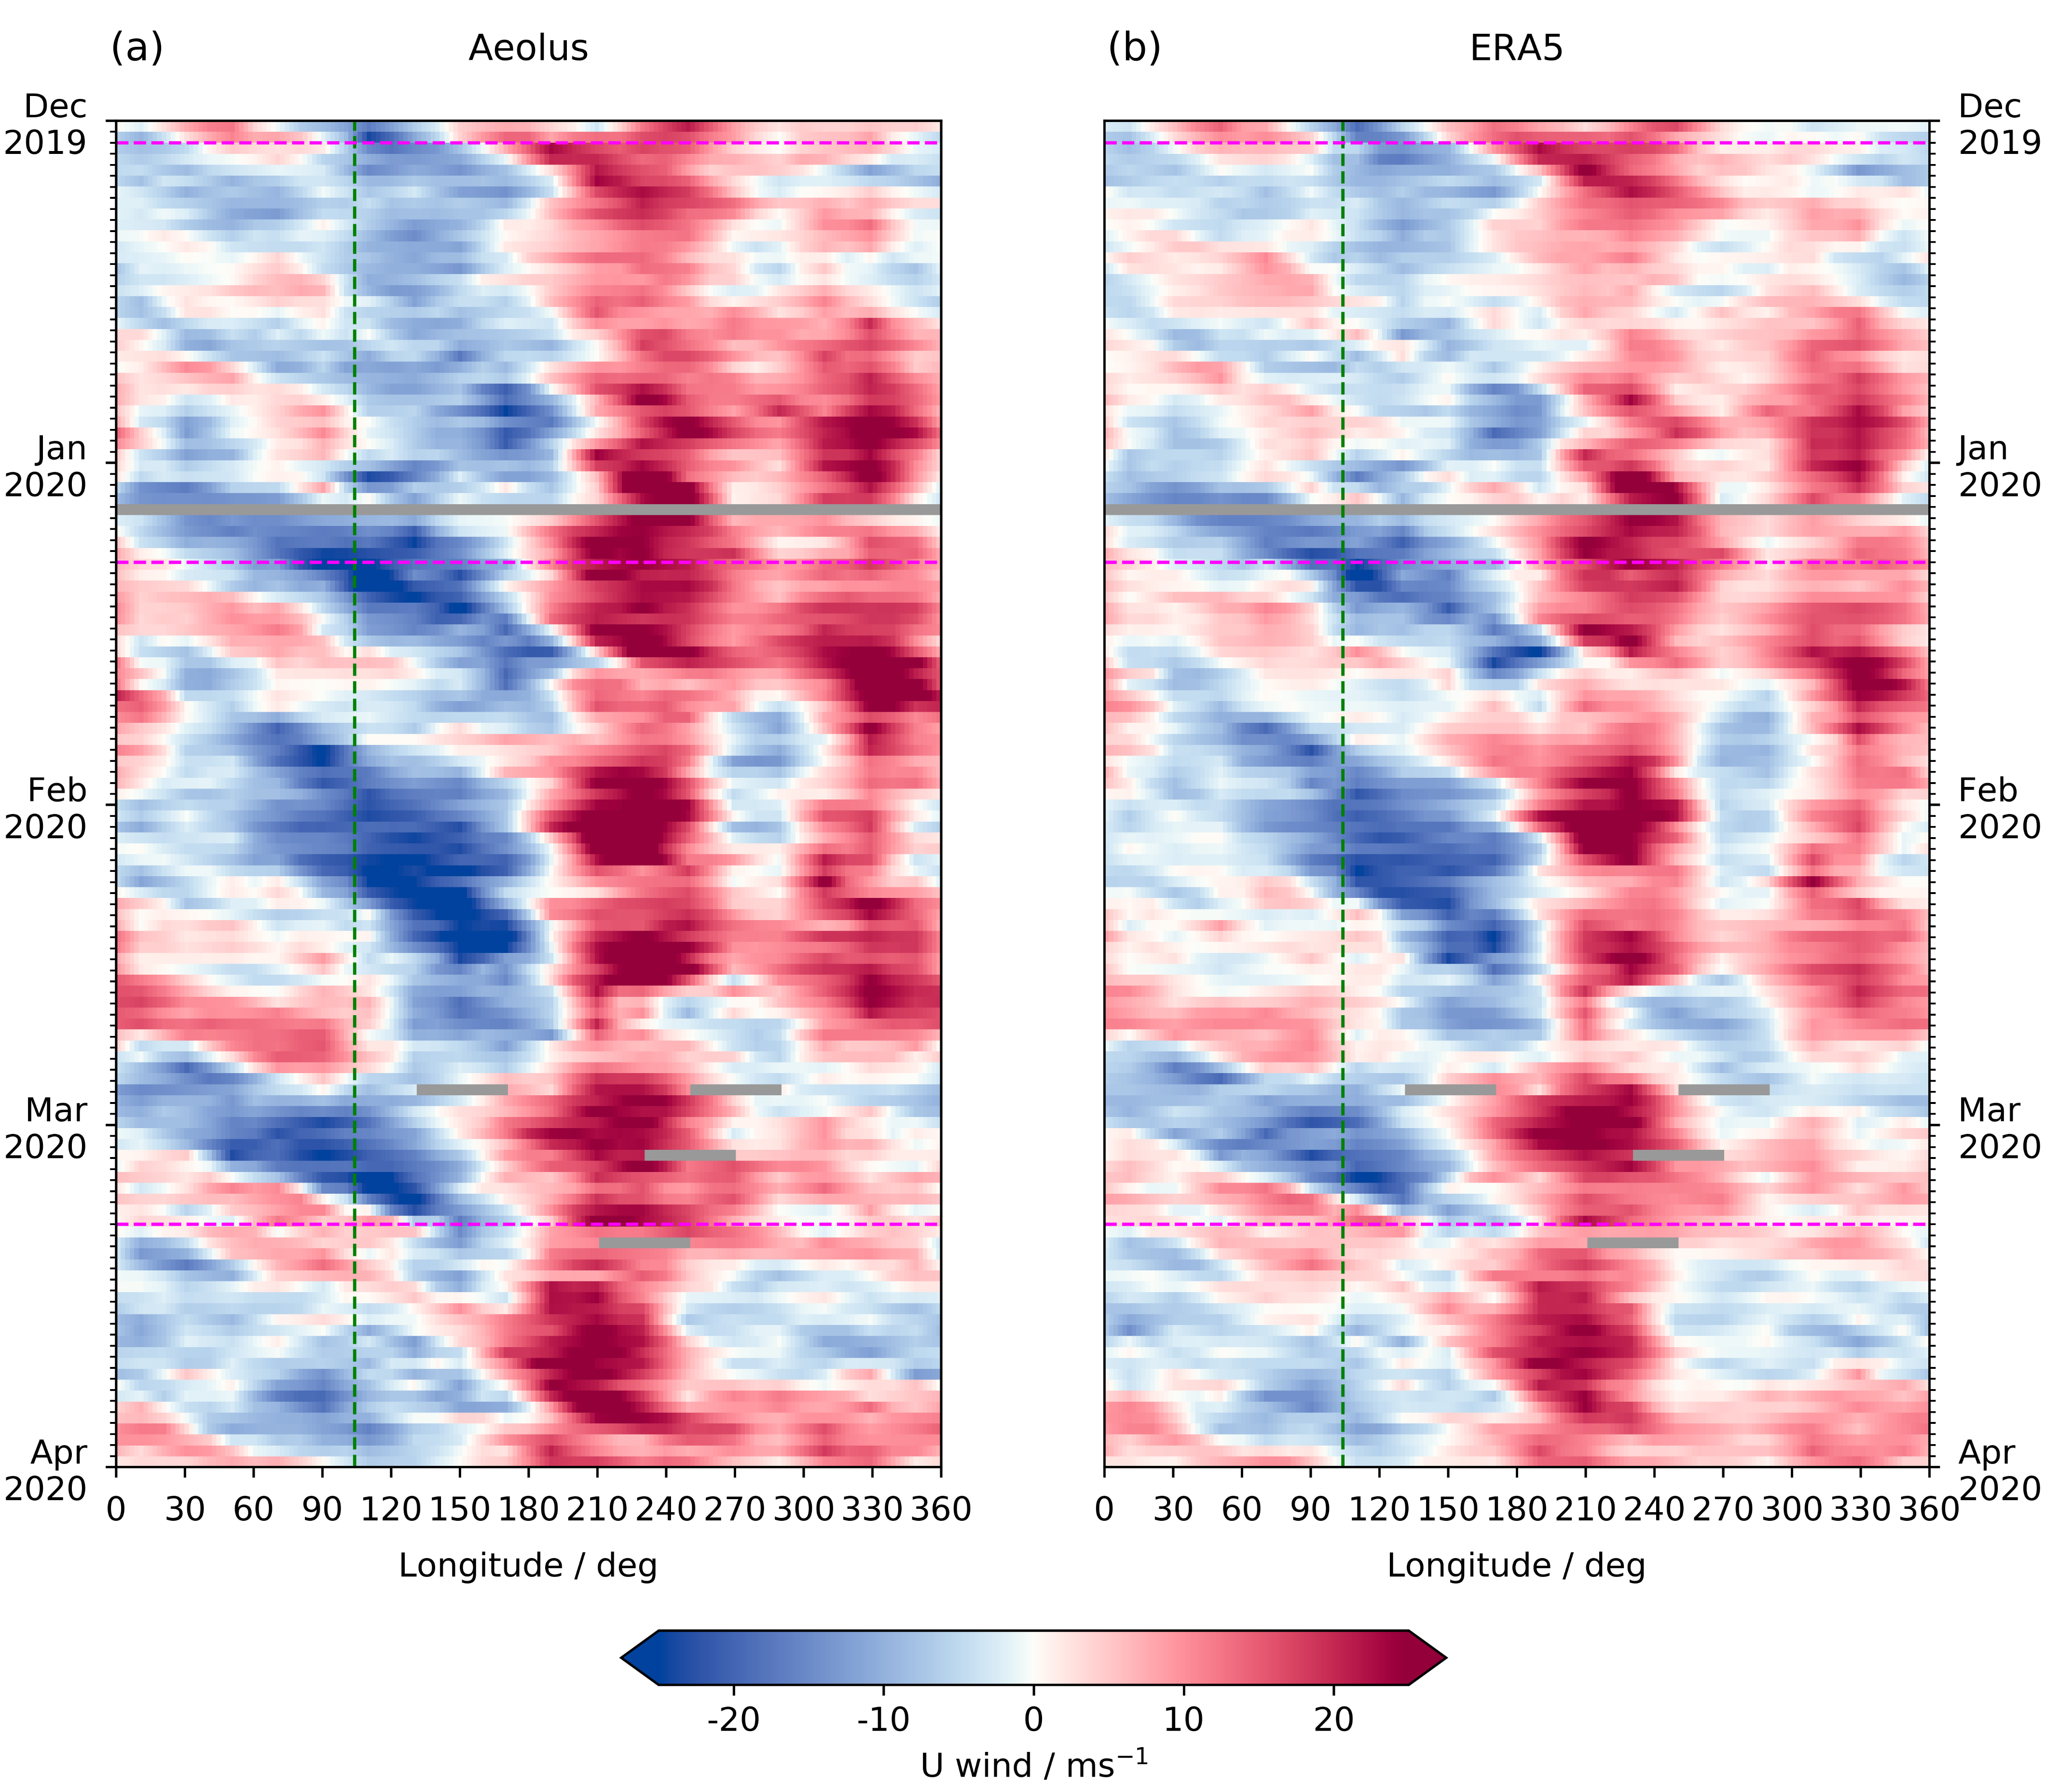

Supplement: Supplementary file 3 [file acp-24-2465-2024-supplement.zip › figs1.png]

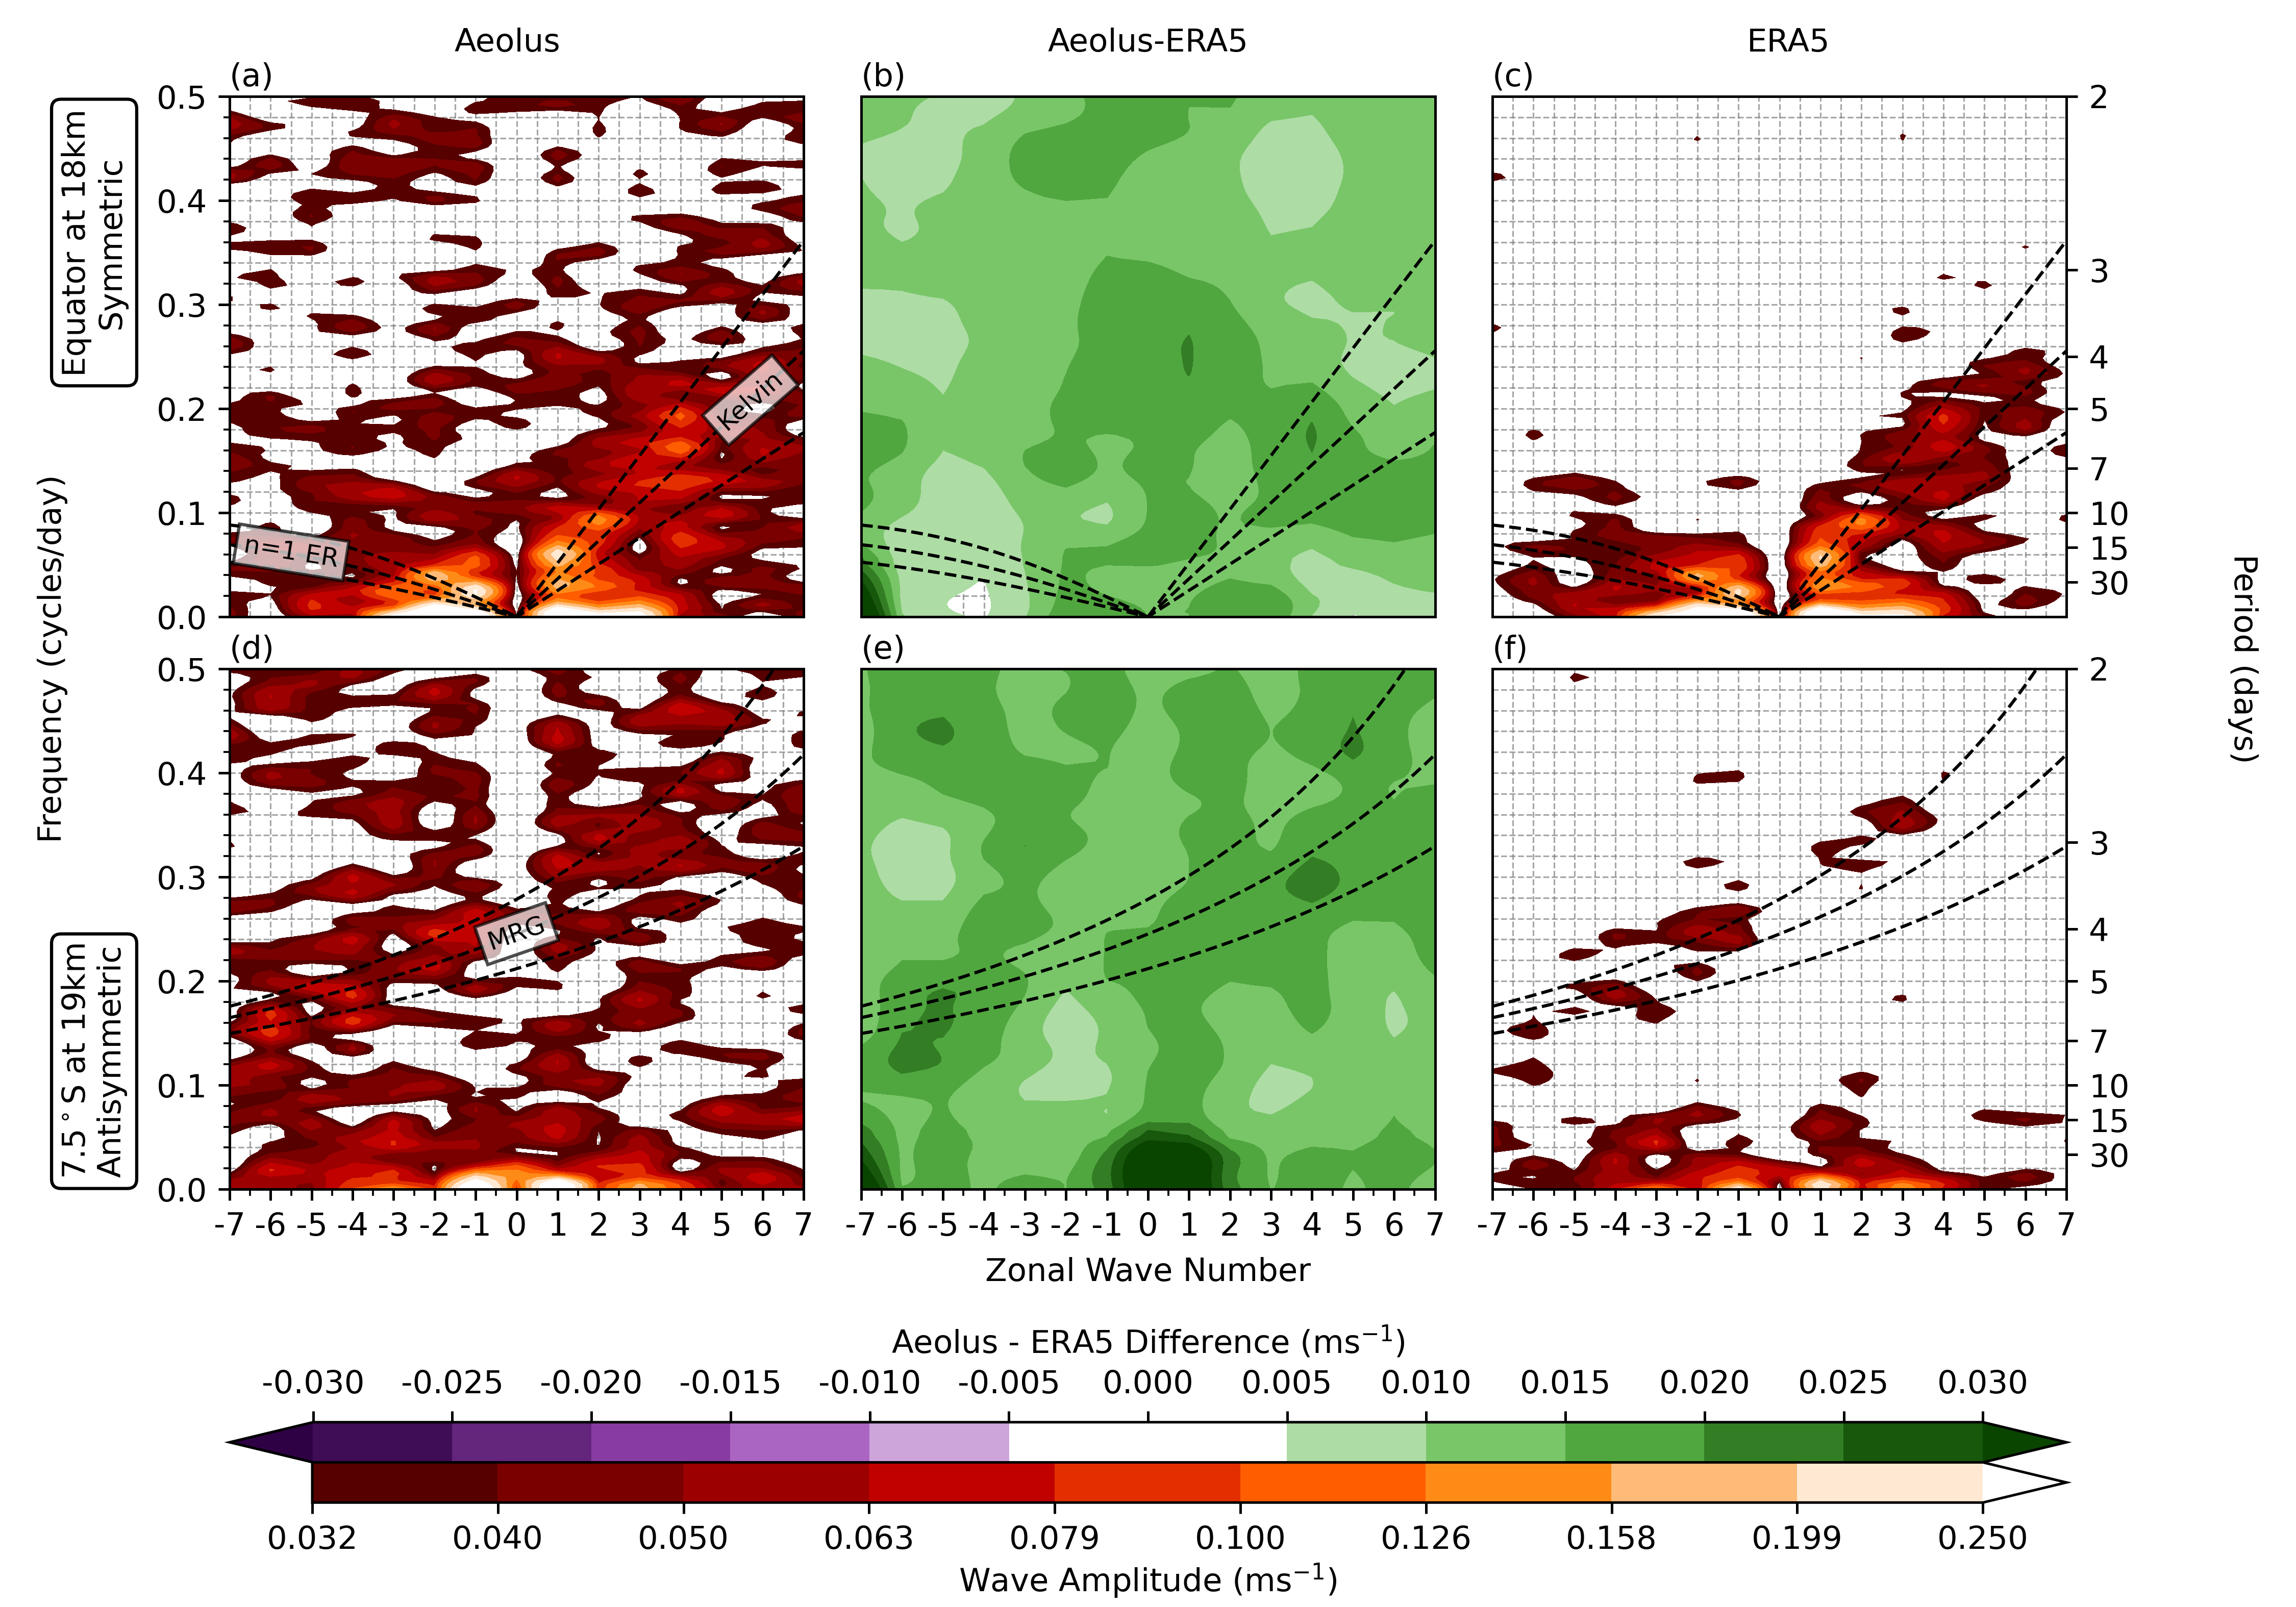

Supplement: Supplementary file 3 [file acp-24-2465-2024-supplement.zip › figs3.png]
